# Supplementary material for: Clustering Approach for the Efficient Solution of Multiscale Stochastic Programming Problems: Application to Energy Hub Design and Operation under Uncertainty
Source: MDPI journal article supplement (doi:10.3390/pr11041046), 2023-03-30
Supplement: s1 [file s1]

Archive with 1 entries (1 files):
- processes-2193829-supplementary.pdf
